# Supplementary material
Source: MDPI journal article supplement (https://www.mdpi.com/2218-0532/91/3/41)
Supplement: s1 [file s1]

## Supplementary Materials

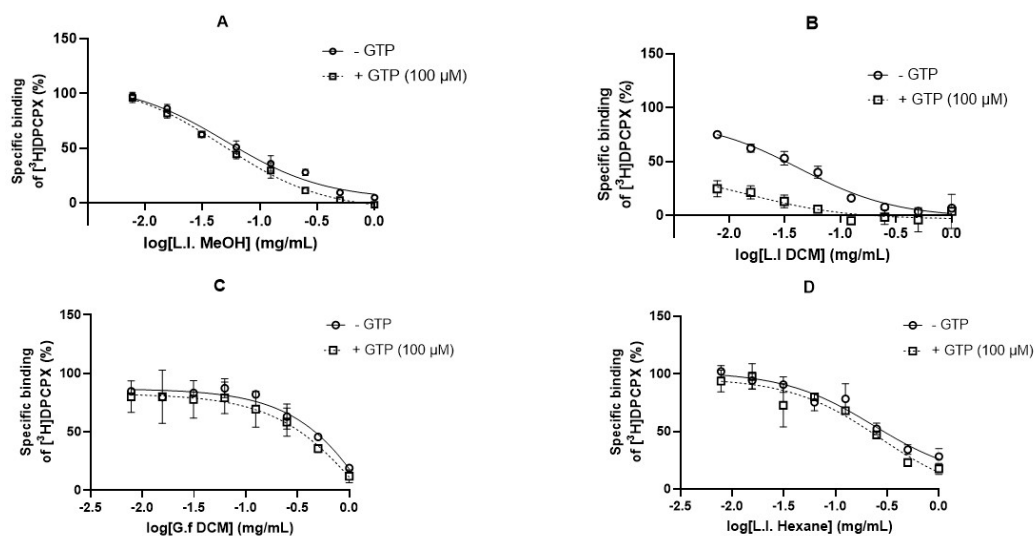

**Supplementary Figure S1:** Binding curves of *Leonotis leonurus* (L.) R.Br. extracts (methanol, MeOH; dichloromethane, DCM; and hexane) and *Gomphocarpus fruticosus* (L.) W.T.Aiton (DCM) extract as examples of A1 AR antagonistic action, determined via a GTP shift assays (with and without 100  $\mu\text{M}$  GTP) in a rat whole brain membranes expressing A1 ARs with  $[^3\text{H}]\text{DPCPX}$  as radioligand. (A) GTP shift of 1 calculated for *Leonotis leonurus* [MeOH], (B) GTP shift of 0.7 calculated for L.I [DCM], (C) GTP shift of 1 calculated for *Gomphocarpus fruticosus* [DCM], and (D) GTP shift of 0.2 calculated for *Leonotis leonurus* [hexane].
